# 1 Computational analysis of filament polymerization dynamics in 2 cytoskeletal networks

3

4 Paulo Caldas<sup>1</sup>, Philipp Radler<sup>1</sup>, Christoph Sommer<sup>1</sup> and Martin Loose<sup>1#</sup>

5 <sup>1</sup>Institute for Science and Technology Austria (IST Austria), Klosterneuburg, Austria

6 #corresponding author: Institute for Science and Technology Austria (IST Austria), Am Campus 1,  
7 3400 Klosterneuburg, Austria. Email: martin.loose@ist.ac.at; Telephone: +43 (0) 2243 9000 6301.

8

## 9 Abstract

10 The polymerization–depolymerization dynamics of cytoskeletal proteins play essential roles in  
11 the self-organization of cytoskeletal structures, in eukaryotic as well as prokaryotic cells. While  
12 advances in fluorescence microscopy and *in vitro* reconstitution experiments have helped to  
13 study the dynamic properties of these complex systems, methods that allow to collect and  
14 analyze large quantitative datasets of the underlying polymer dynamics are still missing. Here,  
15 we present a novel image analysis workflow to study polymerization dynamics of active  
16 filaments in a non-biased, highly automated manner. Using treadmilling filaments of the  
17 bacterial tubulin FtsZ as an example, we demonstrate that our method is able to specifically  
18 detect, track and analyze growth and shrinkage of polymers, even in dense networks of  
19 filaments. We believe that this automated method can facilitate the analysis of a large variety of  
20 dynamic cytoskeletal systems, using standard time-lapse movies obtained from experiments *in*  
21 *vitro* as well as in the living cell. Moreover, we provide scripts implementing this method as  
22 supplementary material.

23

## 24 Contents

|    |                                                                  |    |
|----|------------------------------------------------------------------|----|
| 25 | I. Introduction .....                                            | 2  |
| 26 | II. Approach & Rationale.....                                    | 4  |
| 27 | a) Image Acquisition.....                                        | 5  |
| 28 | b) Generating fluorescent speckles by differential imaging.....  | 5  |
| 29 | III. Image Analysis using ImageJ and Python .....                | 8  |
| 30 | a) Extraction: Generating fluorescent speckles with ImageJ.....  | 8  |
| 31 | b) Tracking: Building trajectories with TrackMate.....           | 9  |
| 32 | c) Tracking analysis: Quantifying speed and directionality ..... | 11 |
| 33 | IV. Other Applications: Tracking microtubule growth.....         | 12 |
| 34 | V. Conclusions .....                                             | 13 |

35 VI. References..... 13

36

37 **I. Introduction**

38 Cytoskeletal proteins related to tubulin and actin play important roles for the intracellular  
39 organization of eukaryotic as well as prokaryotic cells. Both protein families bind nucleoside  
40 triphosphates, either ATP or GTP, which allows them to assemble into filaments, while the  
41 hydrolysis of the nucleotide triggers their disassembly. As a consequence, these cytoskeletal  
42 filaments show unique properties distinct from equilibrium polymers, which are essential for  
43 various complex processes in the living cell, from chromosome segregation to cell motility.

44 Microtubules as well as some prokaryotic actin-related proteins, show a behavior termed  
45 dynamic instability, where one end of the filament shows phases of growth that are  
46 stochastically interrupted by rapid depolymerization events (Deng et al., 2017; Garner,  
47 Campbell, & Mullins, 2004; Horio & Hotani, 1986; Mitchison & Kirschner, 1984; Sammak &  
48 Borisy, 1988). In contrast, filaments formed by actin and by the bacterial tubulin-homolog FtsZ  
49 are known for treadmilling behavior (Fujiwara, Takahashi, Tadakuma, Funatsu, & Ishiwata,  
50 2002; Loose & Mitchison, 2014; Wang, 1985; Wegner, 1976). In this case, nucleotide hydrolysis  
51 coupled with a conformational change of the monomer makes the two ends of the filament  
52 kinetically different such that the polymer unidirectionally grows from one end, while  
53 depolymerization dominates at the opposite end (Wagstaff JM Oliva MA, García-Sánchez A,  
54 Kureisaite-Ciziene D, Andreu JM, Löwe J. et al., 2017).

55 To understand the properties of cytoskeletal filaments and their role for the large-scale  
56 organization of the cell, it is essential to study their polymerization–depolymerization dynamics  
57 and how they are changed by regulatory proteins. This not only requires experimental assays  
58 that can visualize filament dynamics, but also reliable, quantitative methods to measure the  
59 rates of polymerization as well as depolymerization in a non-biased, high-throughput manner.

60 Despite recent advances in high-resolution fluorescence imaging in biology, kymographs are  
61 still the most commonly used approach to visualize dynamics, in particular of cytoskeletal  
62 structures. In kymographs, the intensity along a predefined path is plotted for every image of a  
63 time-lapse movie, which results in the profile at the spatial position of an object over time. This  
64 approach not only helps to visualize dynamic processes, but also allows for a direct read-out of  
65 speed and direction of a moving object by analyzing the slope of a corresponding diagonal line.  
66 Due to their ease of use, kymographs have been routinely used to measure growth and  
67 shrinkage velocities of dynamic systems, including the treadmilling behavior of membrane-

68 bound filaments of FtsZ (Loose & Mitchison, 2014; Ramirez et al., 2016). However, using  
69 kymographs to quantify polymerization dynamics has serious drawbacks. Despite being  
70 assisted by image analysis software, kymographs are essentially a hand-tracking technique,  
71 which makes the collection of large data sets not only impractical but also subject to user bias.

72 Recently, a number of computational approaches have been developed aiming for an  
73 automated analysis of experimental data. In these cases, automatic tracking algorithms were  
74 designed to either follow the position of microtubules or actin filaments in filament gliding assays  
75 (Ruhnow, Zwicker, & Diez, 2011), an important tool to study molecular motors, or microtubule  
76 polymerization dynamics (Kapoor, Hirst, Hentschel, Preibisch, & Reber, 2019). However,  
77 reliable single filament tracking is currently impossible within dense assemblies of  
78 homogeneously labelled filaments, such as in the actin cortex, mitotic spindle or membrane-  
79 bound cytoskeletal networks of FtsZ.

80 To overcome these difficulties, different alternative strategies relying on automated data  
81 collection and analysis have been developed. For instance, fluorescently labelled microtubule  
82 plus-end binding proteins have been used as markers for plus end-growth (Perez,  
83 Diamantopoulos, Stalder, & Kreis, 1999). These proteins specifically recognize a structural  
84 property of the growing end of the microtubule, where they form a characteristic comet-like  
85 fluorescence profile. These comets were first semi-manually tracked and analyzed (Gierke,  
86 Kumar, & Wittmann, 2010), but later improved image analysis methods helped to fully  
87 computationally detect and track EB1 comets in space and time. This made possible to analyze  
88 large populations of microtubule ends in an unbiased manner even in the crowded environment  
89 of a mitotic spindle, microtubule asters in cells or cytoplasmic extracts (Applegate et al., 2011;  
90 Matov et al., 2010). However, up to date the ability to use filament end binding proteins as a  
91 proxy for polymerization dynamics only exists for microtubules and is not available for other  
92 cytoskeletal systems. Furthermore, depolymerization velocities are not directly available with  
93 this method. A more generally applicable approach was introduced with Fluorescent Speckle  
94 Microscopy, which has been proven to be valuable for analyzing *in vivo* dynamics of actin and  
95 microtubule sliding in living cells as well as cell extracts (Waterman-Storer, Desai, Chloe  
96 Bulinski, & Salmon, 1998). Here, small amounts of fluorescently labelled molecules are added  
97 to an endogenous dark background, producing a random distribution of fluorescent spots inside  
98 cytoskeletal structures. Intensity changes in these speckles disclose information regarding the  
99 turnover and binding constants of the subunits, while their motion can be computationally  
100 analyzed to retrieve an intracellular map of polymer dynamics. However, fluorescence speckle

101 microscopy does not provide a direct readout of filament growth and shrinkage. Instead, in the  
102 case of actin, polymerization rates are derived from the quantification of retrograde polymer  
103 flow, while depolymerization is estimated from the decay of speckle number with time  
104 (Watanabe & Mitchison, 2002). Accordingly, in the absence of polymer transport, a  
105 quantification of polymerization dynamics is not possible by Speckle Microscopy.

106 To address these limitations, we sought to develop a new image analysis workflow that would  
107 allow us to track polymerization dynamics in a more accurate and automated manner using  
108 time-lapse movies of homogeneously labeled filaments. We describe here a computational  
109 image analysis strategy to directly quantify the polymerization and depolymerization of  
110 treadmilling FtsZ filaments using established experimental data acquisition protocols. Our  
111 approach relies on standard time-lapse imaging and open-source software tools, which makes it  
112 readily available to study various dynamic processes *in vivo* and *in vitro*.

## 113 **II. Approach & Rationale**

114 The bacterial tubulin FtsZ plays a central role in the spatiotemporal organization of the bacterial  
115 cell division machinery. It assembles into a ring-like cytoskeletal structure at the center of the  
116 cell, (Filho et al., 2016; Loose & Mitchison, 2014; Yang et al., 2017), where treadmilling  
117 filaments of FtsZ recruit and distribute the proteins required for cell division. To study the  
118 intrinsic polymerization dynamics of FtsZ filaments, we routinely use purified proteins in an *in*  
119 *vitro* system based on supported lipid bilayers (SLBs) combined with TIRF microscopy (Fig. 1A).  
120 In this experimental setup, FtsZ and its membrane anchor FtsA form treadmilling filaments on  
121 the membrane surface, which further organize into rotating swirls and moving streams of  
122 filaments (Fig. 1B) (Loose & Mitchison, 2014). As illustrated in Figure 1C, obtaining the velocity  
123 of FtsZ treadmilling from kymographs involves selecting high contrast features, drawing a line  
124 along the treadmilling path and extracting the velocity from the slope. Due to the manual nature  
125 of all of those steps, this procedure is highly sensitive to measurement errors.

126

127

128 The workflow of our new protocol to analyze filament polymerization dynamics starts with  
129 time-lapse movies of evenly labelled FtsZ filament networks, followed by three computational  
130 steps: (i) generation of dynamic fluorescent speckles by image subtraction; (ii) detection and  
131 tracking of fluorescent speckles to build treadmilling trajectories and (iii) analysis of trajectories  
132 to quantify velocity and directionality of filaments. Importantly, after an initial optimization of  
133 parameters, this protocol can be used in batch to access data of thousands of trajectories in a  
134 highly automated manner.

### 135 **a) Image Acquisition**

136 As for all fluorescence microscopy-based approaches, imaging conditions have to be optimized  
137 to avoid excessive photo-bleaching while maintaining a good signal-to-noise ratio. Furthermore,  
138 the acquisition frame rate needs to be sufficiently high to follow the dynamic process of interest.  
139 Detailed experimental protocols to acquire FtsZ treadmilling dynamics can be found in previous  
140 publications of this book series (Baranova & Loose, 2017; Nguyen, Field, Groen, Mitchison, &  
141 Loose, 2015). For FtsZ treadmilling on supported bilayers, we identified a rate of 2 seconds per  
142 frame as well suited to generate well-defined fluorescent speckles. At this rate, an FtsZ filament  
143 is known to grow for 60 - 100 nm, i.e. about the size of a pixel in our TIRF microscope setup that  
144 can be followed in time allowing for unambiguous trajectory building.

### 145 **b) Generating fluorescent speckles by differential imaging**

146 So far, due to the high intensity background in bundles of homogeneously labelled FtsZ  
147 filaments, polymer ends are difficult to identify, which has made the automated detection and  
148 analysis of polymerization impossible. To extract dynamic information from our time-lapse  
149 movies, we took advantage of a background subtraction method also used for motion detection  
150 in computation-aided video surveillance (Singla, 2014). By subtracting the intensity of two  
151 consecutive frames, a new image is created where persistent pixels are removed and only  
152 short-term intensity changes are kept. Thus, non-moving objects generate small absolute pixel  
153 values, while high positive and negative intensity differences correspond to fluorescent material  
154 being added or removed at a given position, respectively. When applying this procedure to our  
155 image sequences, we generate a new time-lapse movie containing moving fluorescent speckles  
156 that correspond to growing and shrinking filament ends within FtsZ bundles. Accordingly, this  
157 process allows to visualize and quantify polymerization as well as depolymerization rates (Fig.  
158 2).

159 While this process can be easily applied using the ImageJ ImageCalculator plugin, simple  
160 image subtraction is susceptible to noise and may generate stretched speckles when the  
161 sample acquisition rates are not ideal. Therefore, we incorporated a pre-processing step where  
162 we apply a spatiotemporal low-pass filter prior to image subtraction (Fig. 2A). This procedure  
163 uses a 3D Gaussian filter where the extent of the smoothing is defined by  $\sigma_{xy}$  and  $\sigma_t$ ,  
164 representing a convolution in space and time, respectively. The spatial smoothing replaces each  
165 pixel value by the Gaussian-weighted average of its neighboring pixels, while the temporal filter  
166 replaces each pixel value by the averaged pixel intensity in the previous and subsequent  
167 frames. This spatiotemporal smoothing not only effectively removes acquisition noise, but also  
168 improves speckle detection and tracking in the next step (Fig. 2B, C).

### 169 **c) Fluorescent speckle detection and trajectory building**

170 To quantitatively describe the dynamic behavior of the fluorescent speckles generated in the  
171 previous step, we took advantage of particle tracking methods, a common tool to quantitatively  
172 analyze the dynamics of moving objects in fluorescent microscopy experiments. These tools are  
173 typically implemented either as scripts for programming languages or as plugins for the widely-  
174 used software platform ImageJ (Schindelin et al., 2017; Schneider, Rasband, & Eliceiri, 2012) or  
175 its distribution FIJI (Schindelin et al., 2012). They usually work by first detecting bright particles  
176 in individual images of time-lapse movies and then reconstructing trajectories from the identified  
177 spatial positions in time (Fig. 2B). Finally, these trajectories can be further analyzed to retrieve  
178 quantitative information about the type of behavior (e.g. directed or diffusive motion), diffusion  
179 constant, velocity or lifetime of the particles, as well as the length of trajectories. In our analysis,  
180 we chose to use TrackMate for particle detection and tracking (Tinevez et al., 2016), not only  
181 because it is an open-source toolbox available for ImageJ, but also because it provides a user-  
182 friendly graphical user interface (GUI) with several useful features for data visualization,  
183 inspection and export.

### 184 **d) Post-tracking analysis**

185 The output of the tracking processes corresponds to the spatiotemporal coordinates of growing  
186 and shrinking filaments ends. To quantify their speed and directionality, we can then compute  
187 their mean squared displacements (MSD,  $\langle \Delta r^2 \rangle$ ), which is given by the squared displacement  
188 as a function of an increasing time lag ( $\delta t$ ):

$$189 \text{ [eq.1] } \langle \Delta r^2 (\delta t) \rangle = \langle (r(t + \delta t) - r(t))^2 \rangle$$

190 where  $r(t)$  is the position of the particle ( $x, y$  coordinates) at time  $t$ , for a given trajectory. MSD  
191 curves are easy to interpret and can be mathematically described by diverse models of motion  
192 (Qian, Sheetz, & Elson, 1991). Most commonly, the MSD is calculated by averaging all  
193 trajectories into one weighted curve, whose shape provides information about the type of  
194 motion, e.g. random motion or directional movement. For instance, for randomly moving  
195 particles, the MSD curve corresponds to a straight line and can be fitted to:

196 [eq.2]  $\langle \Delta r^2(\delta t) \rangle = \langle \Delta r^2(\delta t) \rangle = \langle (r(t + \delta t) - r(t))^2 \rangle = 4Dt$

197 where  $D$  corresponds to the diffusion constant of the particles. For objects moving directionally,  
198 the MSD curve shows a positive curvature and can be fitted to a quadratic equation containing  
199 both a diffusion ( $D$ ) and a constant squared velocity ( $v$ ) term:

200 [eq.3]  $\langle \Delta r^2(\delta t) \rangle = \langle \Delta r^2(\delta t) \rangle = \langle (r(t + \delta t) - r(t))^2 \rangle = 4Dt + v^2t^2$

201 Irregular trajectories containing immobile or confined particles require other models (Qian et al.,  
202 1991). In agreement with the directionality of treadmilling, MSD curves obtained from our  
203 experiments displayed a positive curvature and were always best fitted to quadratic equations  
204 (Fig. 3A).

205 Alternatively, it is possible to compute MSD curves for each trajectory individually (Fig. 3B) and  
206 use the corresponding fitting parameters to calculate a histogram of treadmilling velocities (Fig.  
207 3C). This approach has the advantage of revealing outliers and provides a way to distinguish  
208 between different subpopulations in the data.

209 The mean speed of treadmilling can also be obtained by calculating the histogram of  
210 instantaneous displacements of every detected particle between two consecutive frames. For  
211 FtsZ treadmilling, this gives rise to a positively skewed normal distribution that peaks at a  
212 velocity similar to the one obtained from the MSD fits with a long tail towards faster values (Fig.  
213 3D).

214 We further corroborated the directionality of the trajectories by computing the directional  
215 autocorrelation function (Fig. 3E). The corresponding correlation coefficient ( $\varphi$ ) is a measure for  
216 the local directional persistence of treadmilling trajectory  $i$  and is obtained by computing the  
217 correlation of the angle between two consecutive displacements  $\vec{v}_i$  as a function of an  
218 increasing time interval ( $\delta t$ ) (Gorelik & Gautreau, 2014; Qian et al., 1991).

219 [eq. 4]  $\varphi(\delta t) = \langle \vec{v}_i(t) \cdot \vec{v}_i(t + \delta t) \rangle$

220 Randomly moving particles typically show completely uncorrelated velocity vectors with  $\varphi = 0$   
221 for all  $\delta t$ , while directed moving particles have display highly correlated velocity vectors ( $\varphi > 0$ )  
222 even for larger  $\delta t$ . Accordingly, for our fluorescent speckles we obtained continuously positive  
223 correlation values.

224

### 225 III. Image Analysis using ImageJ and Python

226 To analyze multiple time-lapse movies of treadmilling filaments in an automated manner, we  
227 developed macros based on ImageJ plug-ins and Python. These are easy to use, require no  
228 programming knowledge and are available as supplementary material on Github:

229 <https://github.com/paulocaldas/Treadmilling-Speed-Analysis>.

230 This software package is organized into three different computational steps:

- 231 (i) **extraction**: ImageJ macro to automatically generate fluorescent speckles from time-  
232 lapse movies;
- 233 (ii) **tracking**: ImageJ macro that internally uses TrackMate for detection and tracking of  
234 fluorescence speckles;
- 235 (iii) **tracking\_analysis**: Python package providing an IPython notebook with detailed  
236 analysis of the trajectories generated by TrackMate.

237 All these scrips can be applied for a single time-lapse movie or for multiple files at once in  
238 batch processing mode. This creates a highly time-efficient routine to identify and track  
239 thousands of speckles at once. Below, we provide a simple protocol on how to use the  
240 macros.

#### 241 a) **Extraction: Generating fluorescent speckles with ImageJ**

242 To generate speckles from a single time-lapse movie:

- 243 1. Open movie of interest in ImageJ (or Fiji).
- 244 2. Open macro `extract_growth_shrink.py` and run it.
- 245 3. A window pops up to correct/confirm the physical units (i.e. pixel-width and frame  
246 interval).
- 247 4. A dialog is displayed to set the frame range for the image subtraction – processes the  
248 entire movie by default - and the Gaussian smoothing parameters  $\sigma_{xy}$  and  $\sigma_t$ . Generally,  
249 the extent of the spatial smoothing is defined by the standard deviation ( $\sigma$ ) of two  
250 Gaussian functions ( $\sigma_x$  and  $\sigma_y$ ). Our protocol applies isotropic smoothing ( $\sigma_x = \sigma_y =$



251  $\sigma_{xy}$ ) and should be adjusted according to the size of the object of interest (in pixels).  
252 Likewise, the number of frames considered for temporal filtering ( $\sigma_t$ ) depends on the  
253 dynamics of the process studied and needs to be optimized for the given frame rate.  
254 This parameter is adjusted through trial and error until speckles with a good signal-to-  
255 noise ratio are created. For our images we used  $\sigma_{xy} = 0.5$  pixels and  $\sigma_t = 1.5$  frames.  
256 5. The output is a composite movie containing two new channels corresponding to growth  
257 (green) and shrinkage (red) together with the raw data (blue). These channels can be  
258 split and used for the following analysis step (Fig. 2A).

259 Once the optimal Gaussian smoothing parameters are defined for a given experimental  
260 setup, this process can be applied for several files at once in batch process mode:

- 261 1. Open macro `extract_growth_shrink_batch.py` in ImageJ (or Fiji) and run it.
- 262 2. A dialog is displayed to select a directory containing the input movies and set the  
263 parameters for batch analysis. By default `.tif` and `.tf8` files are processed, if no other file  
264 extension is provided. As before, set the frame range, calibrate the physical units, and  
265 provide the optimal parameters ( $\sigma_{xy}$  and  $\sigma_t$ ) ideally determined beforehand using the  
266 macro for a single movie.
- 267 3. Gaussian smoothing and image subtraction are then applied for every file in the input  
268 directory and two time-lapse movies containing fluorescent speckles (growth and  
269 shrinkage) are saved to disk.

## 270 **b) Tracking: Building trajectories with TrackMate**

271 When applying this routine for the first time, TrackMate GUI should be used to identify the  
272 optimal parameters for detecting, tracking and linking the trajectories of fluorescent  
273 speckles. In contrast to single molecule imaging, fluorescent speckles generated by image  
274 subtraction can vary a lot in shape and intensity. Therefore, care must be taken to find the  
275 right parameters and to discard noise due to random motion. Detailed documentation on  
276 how to use TrackMate can be found in (Tinevez et al., 2016) as well as online  
277 (<https://imagej.net/TrackMate>). Nevertheless, we briefly describe here our rationale to find  
278 the optimal parameters using TrackMate GUI:

- 279 1. Open a differential movie obtained from step a) in ImageJ (or Fiji).
- 280 2. Run TrackMate GUI (from Plugins menu)
- 281 3. The first panel displays space and time units from the file metadata. They should be  
282 accurate as they were calibrated in the previous step when generating the fluorescent

283 speckles. This is important as every subsequent step will be dependent on this  
284 calibration and not on the pixel units anymore.

- 285 4. Select the Laplacian of Gaussian detector (LoG) for particle detection.
- 286 5. Tune the particle's *estimated diameter* using the 'preview' tool, which overlays all  
287 detections with circles (magenta) having the set diameter. Note that a high number of  
288 low quality spots are erroneously detected by default. They can be easily discarded  
289 increasing the *threshold* parameter. Check box for the median filter and sub-pixel  
290 localization to improve the quality of detected spots. For speckles obtained from FtsZ  
291 treadmilling, TrackMate achieves robust detection using a spot diameter of 0.8 microns  
292 and a threshold of 1. Following the detection process, we set an additional filter to keep  
293 only particles with a signal-to-noise ratio higher than 1.
- 294 6. For trajectory building, we use the Simple Linear Assignment Problem (LAP) tracker  
295 algorithm, which requires three parameters: (i) the *max linking distance*, (ii) the *max*  
296 *distance for gap* closing and (iii) the *max frame gap*. The first parameter defines the  
297 maximally allowed displacement between two subsequent frames. This value has to be  
298 chosen carefully, as too low values result in fragmentation of trajectories with large  
299 displacement steps, while too large values can lead to erroneous linking. The other two  
300 parameters consider spot disappearance when building trajectories, which can be  
301 caused by focus issues during data acquisition. The temporal Gaussian filter applied in  
302 our pre-processing steps minimizes any gaps in the treadmilling trajectories.  
303 Accordingly, we set *max linking distance* to 0.5  $\mu\text{m}$  and *max distance for gap* closing to  
304 0.
- 305 7. After the trajectories are built, we exclude trajectories shorter than six seconds and  
306 trajectories with a total displacement smaller than 0.4  $\mu\text{m}$  (half of the particle diameter)  
307 to avoid tracking fluorescent speckles not corresponding to treadmilling events.
- 308 8. At this point, TrackMate offers a set of interactive tools to examine spots and tracks,  
309 which are useful to evaluate the quality of the tracking process, revisit the procedure and  
310 adjust some of the parameters. All trajectories are then exported as an XML file (last  
311 panel), which contains all the identified treadmilling tracks as spot positions in time.

312 Once the parameters for a given experimental setup are defined, the TrackMate protocol  
313 can be applied to multiple time-lapse movies simultaneously with our ImageJ macro named  
314 `track_growth_shrink_batch.py`. This macro provides a GUI to select a directory folder  
315 containing growth/shrinkage movies and to define all the parameters described before.  
316 TrackMate runs windowless for all files and saves the resulting XML file containing spot

317 coordinates in the same directory. In addition, a TrackMate file suffixed ‘\_TM.xml’ is  
318 generated, which can be loaded into ImageJ using the “Load TrackMate file” command and  
319 allows to revisit the whole analysis process for each file individually.

### 320 **c) Tracking analysis: Quantifying speed and directionality**

321 Our routine to analyze speckle trajectories was implemented in Python and can be used  
322 from an IPython notebook. It contains two main functions: one to analyze a single XML file  
323 and a second one to analyze a folder containing multiple XML files at once. All imported  
324 modules located in the adjacent folder can be edited and adapted according to the needs of  
325 each user. Our code depends on Python  $\geq 3.6$  and we recommend to use the Anaconda  
326 python distribution.

327 To install all the required Python packages for the analysis:

- 328 1. Clone/download the Github repository tracking\_analysis to a given directory.
- 329 2. Open Anaconda prompt in the start menu (command line) and change the directory to  
330 tracking\_analysis folder by typing:

```
331 cd path_to_directory\tracking_analysis
```

- 332 3. Install all necessary Python modules locally by writing (note the dot at the end):

```
333 pip install -r requirements.txt -e .
```

- 334 4. All requirements are automatically resolved.

335 To use the notebook:

- 336 1. Open analyze\_tracks.ipynb in Jupyter or IPython notebook.
- 337 2. The first module uses a single XML file (TrackMate output) as input, set by the variable  
338 “filename” inside the function. This script computes: (i) the weighted-mean MSD curve  
339 and estimates velocity by fitting the data to eq.3; (ii) the distribution of velocities from  
340 fitting MSD curves individually with eq.3; (iii) the distribution of velocities directly  
341 estimated from spot displacement inside each track; (iv) the velocity auto-correlation  
342 analysis using the definition on eq.4. All plots are displayed and saved into a single pdf  
343 file along with an excel book containing all the data to plot elsewhere if needed.
- 344 3. The second module uses a directory as input and runs the exact same process for every  
345 XML file inside. As above, all the plots and raw data are saved in a pdf file and excel  
346 book, respectively.

347 Note that our protocol assumes directed motion of the speckles and for that reason,  
348 MSD curves in our Python script are always fitted to eq.3, as described before.  
349 Moreover, as the lag time increases, the number of MSD coefficients available for  
350 averaging decreases, producing poor statistics for higher lag times. For this reason,  
351 MSD curves are typically fit to less than 50% of the total length of the trajectories. In our  
352 notebook, `clip` is an adjustable parameter that defines the % of the trajectory length to  
353 be fitted and is set to 50% by default (`clip = 0.5`), the value used in our analysis. A  
354 second optional parameter named `plot_every` can be tuned. This is inversely  
355 proportional to the number of individual MSD curves to plot, which can help in dealing  
356 with a crowded plot and computation time.

357 An optional feature allows to run this analysis using the command line interface:

- 358 1. Open Anaconda prompt and change directory to `tracking_analysis` (as above)
- 359 2. Run the Python command line interface. e.g for example file with `clip = 0.25`:

```
360 analyze_tracks_cli example\example_growth_Tracks.xml --clip 0.25
```

361

362 The final output of our program are five individual graphs showing the instantaneous velocities  
363 of growing and shrinking ends, MSD curves of individual trajectories and corresponding  
364 histogram, a plot of the weighted average of all MSD curves, as well as the directional  
365 autocorrelation. In sum, our macros provide a detailed analysis of filament polymerization  
366 dynamics.

367

#### 368 **IV. Other applications: Tracking microtubule growth**

369 Our method was initially developed to track treadmilling dynamics of FtsZ filaments, but is  
370 applicable to other dynamic filament systems as well. As an example, we chose analyze the  
371 growth dynamics of microtubules in *Xenopus* egg extracts (see Fig. 4). Image subtraction of the  
372 original movie gives rise to fluorescent speckles at the growing end of microtubules, which have  
373 an appearance reminiscent to EB1 comets. Automated tracking of these speckles shows that  
374 the average microtubule growth speed under these conditions was  $7.3 \pm 2.9 \mu\text{m}/\text{min}$ . This value  
375 was obtained within a couple of minutes from the analysis of more than 500 trajectories and is  
376 similar to previous reports, where growth was quantified using 50 to 100 kymographs (Thawani,  
377 Kadzik, & Petry, 2018). Depolymerization events were not detected using this method.

378

## 379 **V. Conclusions**

380 We present a framework for the computational analysis of treadmilling filaments, in particular  
381 the rate of polymerization and depolymerization of membrane-bound FtsZ filaments. Although  
382 we used this approach to quantitatively characterize growth and shrinkage of treadmilling FtsZ  
383 filaments *in vitro*, this approach is applicable to study the polymerization dynamics of other  
384 cytoskeletal systems as well. In contrast to previous methods, this method can be applied on  
385 any time-lapse movie of homogeneously labelled filaments as it does not require specific  
386 markers for polymer ends. It also allows to quantify both, growing and shrinking rates of  
387 dynamic cytoskeletal filaments. Furthermore, it can be easily extended with more complex  
388 analyses, for example to generate spatiotemporal maps of filament dynamics in living cells. In  
389 fact, combined with an appropriate detection procedure, the approach used here should also  
390 allow to visualize and track motion on every spatial and temporal scale, not only cytoskeletal  
391 structures *in vivo* and *in vitro*, but also crawling cells and migrating animals.

392 In sum, the method described here surpasses the limitations of kymographs, as it allows for a  
393 non-biased quantification of dynamic processes in an automated fashion.

394

## 395 **VI. References**

- 396 Applegate, K. T., Besson, S., Matov, A., Bagonis, M. H., Jaqaman, K., & Danuser, G. (2011).  
397 PlusTipTracker: Quantitative image analysis software for the measurement of microtubule  
398 dynamics. *Journal of Structural Biology*. <https://doi.org/10.1016/j.jsb.2011.07.009>
- 399 Baranova, N., & Loose, M. (2017). Single-molecule measurements to study polymerization  
400 dynamics of FtsZ-FtsA copolymers. *Methods in Cell Biology*.  
401 <https://doi.org/10.1016/bs.mcb.2016.03.036>
- 402 Deng, X., Fink, G., Bharat, T. A. M., He, S., Kureisaite-Ciziene, D., & Löwe, J. (2017). Four-  
403 stranded mini microtubules formed by *Prostheco bacter* BtubAB show dynamic instability .  
404 *Proceedings of the National Academy of Sciences*.  
405 <https://doi.org/10.1073/pnas.1705062114>
- 406 Filho, A. W. B., Hsu, Y., Squyres, G. R., Kuru, E., Wu, F., Jukes, C., ... Garner, E. C. (2016).  
407 Treadmilling by FtsZ filaments drives peptidoglycan synthesis and bacterial cell division .
- 408 Fujiwara, I., Takahashi, S., Tadakuma, H., Funatsu, T., & Ishiwata, S. (2002). Microscopic

- 409 analysis of polymerization dynamics with individual actin filaments. *Nature Cell Biology*.  
410 <https://doi.org/10.1038/ncb841>
- 411 Garner, E. C., Campbell, C. S., & Mullins, R. D. (2004). Dynamic instability in a DNA-  
412 segregating prokaryotic actin homolog. *Science*. <https://doi.org/10.1126/science.1101313>
- 413 Gierke, S., Kumar, P., & Wittmann, T. (2010). *Analysis of Microtubule Polymerization Dynamics*  
414 *in Live Cells. Methods in Cell Biology*. [https://doi.org/10.1016/S0091-679X\(10\)97002-7](https://doi.org/10.1016/S0091-679X(10)97002-7)
- 415 Gorelik, R., & Gautreau, A. (2014). Quantitative and unbiased analysis of directional persistence  
416 in cell migration. *Nature Protocols*, 9(8), 1931–1943. <https://doi.org/10.1038/nprot.2014.131>
- 417 Horio, T., & Hotani, H. (1986). Visualization of the dynamic instability of individual microtubules  
418 by dark-field microscopy. *Nature*. <https://doi.org/10.1038/321605a0>
- 419 Kapoor, V., Hirst, W. G., Hentschel, C., Preibisch, S., & Reber, S. (2019). MTrack: Automated  
420 Detection, Tracking, and Analysis of Dynamic Microtubules. *Scientific Reports*.  
421 <https://doi.org/10.1038/s41598-018-37767-1>
- 422 Loose, M., & Mitchison, T. J. (2014). The bacterial cell division proteins FtsA and FtsZ self-  
423 organize into dynamic cytoskeletal patterns. *Nature Cell Biology*, 16(1), 38–46.  
424 <https://doi.org/10.1038/ncb2885>
- 425 Matov, A., Applegate, K., Kumar, P., Thoma, C., Krek, W., Danuser, G., & Wittmann, T. (2010).  
426 Analysis of microtubule dynamic instability using a plus-end growth marker. *Nature*  
427 *Methods*. <https://doi.org/10.1038/nmeth.1493>
- 428 Mitchison, T., & Kirschner, M. (1984). Dynamic instability of microtubule growth. *Nature*.  
429 <https://doi.org/10.1038/312237a0>
- 430 Nguyen, P. A., Field, C. M., Groen, A. C., Mitchison, T. J., & Loose, M. (2015). Using supported  
431 bilayers to study the spatiotemporal organization of membrane-bound proteins. *Methods in*  
432 *Cell Biology*. <https://doi.org/10.1016/bs.mcb.2015.01.007>
- 433 Perez, F., Diamantopoulos, G. S., Stalder, R., & Kreis, T. E. (1999). CLIP-170 highlights  
434 growing microtubule ends in vivo. *Cell*. [https://doi.org/10.1016/S0092-8674\(00\)80656-X](https://doi.org/10.1016/S0092-8674(00)80656-X)
- 435 Qian, H., Sheetz, M. P., & Elson, E. L. (1991). Single particle tracking. Analysis of diffusion and  
436 flow in two-dimensional systems. *Biophysical Journal*. [https://doi.org/10.1016/S0006-3495\(91\)82125-7](https://doi.org/10.1016/S0006-3495(91)82125-7)
- 437
- 438 Ramirez, D., Garcia-Soriano, D. A., Raso, A., Feingold, M., Rivas, G., & Schwille, P. (2016).  
439 Chiral vortex dynamics on membranes is an intrinsic property of FtsZ, driven by GTP

- 440 hydrolysis. *BioRxiv*.
- 441 Ruhnow, F., Zwicker, D., & Diez, S. (2011). Tracking single particles and elongated filaments  
442 with nanometer precision. *Biophysical Journal*. <https://doi.org/10.1016/j.bpj.2011.04.023>
- 443 Sammak, P. J., & Borisy, G. G. (1988). Direct observation of microtubule dynamics in living  
444 cells. *Nature*. <https://doi.org/10.1038/332724a0>
- 445 Schindelin, J., Arena, E. T., DeZonia, B. E., Hiner, M. C., Eliceiri, K. W., Rueden, C. T., &  
446 Walter, A. E. (2017). ImageJ2: ImageJ for the next generation of scientific image data.  
447 *BMC Bioinformatics*. <https://doi.org/10.1186/s12859-017-1934-z>
- 448 Schindelin, J., Arganda-Carreras, I., Frise, E., Kaynig, V., Longair, M., Pietzsch, T., ... Cardona,  
449 A. (2012). Fiji: an open-source platform for biological-image analysis. *Nature Methods*.  
450 <https://doi.org/10.1038/nmeth.2019>
- 451 Schneider, C. A., Rasband, W. S., & Eliceiri, K. W. (2012). NIH Image to ImageJ: 25 years of  
452 image analysis. *Nature Methods*.
- 453 Singla, N. (2014). Motion Detection Based on Frame Difference Method. *International Journal of*  
454 *Information & Computation Technology*.
- 455 Thawani, A., Kadzik, R. S., & Petry, S. (2018). XMAP215 is a microtubule nucleation factor that  
456 functions synergistically with the  $\gamma$ -tubulin ring complex. *Nature Cell Biology*.  
457 <https://doi.org/10.1038/s41556-018-0091-6>
- 458 Tinevez, J. Y., Perry, N., Schindelin, J., Hoopes, G. M., Reynolds, G. D., Laplantine, E., ...  
459 Eliceiri, K. W. (2016). TrackMate: An open and extensible platform for single-particle  
460 tracking. *Methods*, 115, 80–90. <https://doi.org/10.1016/j.ymeth.2016.09.016>
- 461 Wagstaff JM, Oliva MA, García-Sánchez A, Kureisaite-Ciziene D, Andreu JM, Löwe J., T. M.,  
462 JM, W., M, T., MA, O., A, G.-S., D, K.-C., ... J, L. (2017). A Polymerization-Associated  
463 Structural Switch in FtsZ That Enables Treadmilling of Model Filaments. *MBio*.  
464 <https://doi.org/10.1128/mBio.00254-17>
- 465 Wang, Y. L. (1985). Exchange of actin subunits at the leading edge of living fibroblasts: Possible  
466 role of treadmilling. *Journal of Cell Biology*. <https://doi.org/10.1083/jcb.101.2.597>
- 467 Watanabe, N., & Mitchison, T. J. (2002). Single-molecule speckle analysis of actin filament  
468 turnover in lamellipodia. *Science*. <https://doi.org/10.1126/science.1067470>
- 469 Waterman-Storer, C. M., Desai, A., Choe Bulinski, J., & Salmon, E. D. (1998). Fluorescent  
470 speckle microscopy, a method to visualize the dynamics of protein assemblies in living

471 cells. *Current Biology*, 8(22), 1227-S1. [https://doi.org/10.1016/S0960-9822\(07\)00515-5](https://doi.org/10.1016/S0960-9822(07)00515-5)

472 Wegner, A. (1976). Head to tail polymerization of actin. *Journal of Molecular Biology*.

473 [https://doi.org/10.1016/S0022-2836\(76\)80100-3](https://doi.org/10.1016/S0022-2836(76)80100-3)

474 Yang, X., Lyu, Z., Miguel, A., Mcquillen, R., Huang, K. C., & Xiao, J. (2017). GTPase activity–  
475 coupled treadmilling of the bacterial tubulin FtsZ organizes septal cell wall synthesis.

476 *Science*, 355(6326), 744–747. <https://doi.org/10.1126/science.aak9995>

## 477 **Figure Captions**

### 478 **Fig. 1: Time-lapse imaging of dynamic FtsZ filaments**

479 **(A)** Illustration of the experimental assay based on a supported lipid bilayer, purified proteins  
480 and TIRF microscopy. **(B)** Snapshot of FtsZ (30% Cy5-labelled) pattern emerging from its  
481 interaction with FtsA, 15min after the addition of GTP and ATP to the reaction buffer. Scale  
482 bars, 5 $\mu$ m. **(C)** Representative kymograph of treadmilling dynamics taken along the contour of a  
483 rotating FtsZ ring. The shaded bar illustrates the imprecision associated with manually drawing  
484 the diagonal line to estimate velocity (red). Scale bars, x = 2 $\mu$ m, t = 20s.

### 485 **Fig. 2: Generating fluorescent speckles by differential imaging**

486 **(A)** Illustration of the Gaussian filtering step in space (I) and time (II) before image subtraction  
487 (III). The smoothing in space and time is proportional to  $\sigma_{xy}$  and  $\sigma_t$ , respectively, and  $\mu = 0$   
488 represents the mean value of the distribution. **(B)** Representation of differential TIRF images to  
489 visualize polymerization (growth) and depolymerization (shrinkage) of FtsZ filaments and  
490 automated tracking of treadmilling dynamics with TrackMate (ImageJ). Scale bars, 5 $\mu$ m **(C)**  
491 Characteristic detection and tracking of fluorescent speckles inside bundles of FtsZ ring-like  
492 structures. Scale bars, 2  $\mu$ m.

### 493 **Fig. 3: Quantitative analysis of speckles trajectories**

494 **(A)** weighted-mean MSD curve estimated from all trajectories for growth (green dots) and  
495 shrinkage (magenta dots) movies. Solid lines represent fitting the data to a quadratic equation  
496 (eq.3) to estimate the mean velocity of the speckles. We used 50% of the max track length for  
497 fitting and the shade bars correspond to the standard deviation of all the tracks. **(B)** Individual  
498 MSD curves for growth (green lines) and shrinkage (magenta lines) movies. **(C)** Distribution of  
499 velocity values obtained from fitting eq.3 to 50% of each individual MSD curve in B, for both  
500 growth (green) and shrinkage (magenta) movies. Data is fitted to a Gaussian function (solid  
501 lines) to estimate mean velocity value. **(D)** Distribution of velocity values obtained from the step



502 size displacements of speckles between consecutive time points. **(E)** Velocity auto-correlation  
503 analysis using the definition in eq.4. Correlation function shows positive values even for larger  
504  $\delta t$ , for both growth and shrinkage events, characteristic of particles moving directionally.

#### 505 **Fig. 4: Quantitative analysis of microtubule growth**

506 **(A)** Snapshot of a microtubule branching time-lapse experiment merged with fluorescent  
507 speckles, corresponding to the growing ends (left) and examples for trajectories obtained after  
508 performing automated tracking (right). Scale bar is  $2\mu\text{m}$ . **(B-E)** Summary of the analysis output  
509 **(B)** MSD curves for individual trajectories and **(C)** the weighted mean MSD curve for growing  
510 microtubule ends, where the solid line represents a fit of a quadratic equation (eq.3) to the data,  
511 to estimate the mean velocity. Shaded bars represent the standard deviation of all tracks. **(D)** A  
512 Gaussian function (solid line) is fitted to the distribution of all MSD to estimate the mean velocity  
513 value. **(E)** Distribution of velocity values obtained from the step size displacements of speckles  
514 between consecutive time points.

515

#### 516 **Acknowledgements**

517 We kindly thank Franziska Decker, Benjamin Dalton and Jan Brugués (Max Planck Institute,  
518 Dresden, Germany) for providing us with a time lapse of movie of microtubules and also for their  
519 feedback on our manuscript. We thank all Loose lab members for support and useful  
520 discussions, in particular to Natalia Baranova for the critical review of our methodology in  
521 general. This work was supported by a European Research Council (ERC) grant awarded to  
522 Martin Loose (ERC-2015-StG-679239) and a Boehringer Ingelheim Fonds (BIF) PhD fellowship  
523 awarded to Paulo Caldas.

#### 524 **Author contributions**

525 Project Management: M.L.; Conceptualization and Design: M.L, P.C and P.R; Experimental Data  
526 Collection and Image analysis: P.C and P.R; ImageJ and Python Programming: C.S and P.C;  
527 Data interpretation: M.L, P.C and PR; Data Visualization: P.C, P.R and C.S; Manuscript  
528 Drafting: P.C and M.L; Critical Revision of the Manuscript: All authors; Final version was read by  
529 all authors and approved to be published.

#### 530 **Competing interests**

531 The authors declare no competing interests.



**Fig.1**

bioRxiv preprint doi: <https://doi.org/10.1101/839571>; this version posted November 13, 2019. The copyright holder for this preprint (which was not certified by peer review) is the author/funder, who has granted bioRxiv a license to display the preprint in perpetuity. It is made available under aCC-BY-NC-ND 4.0 International license.

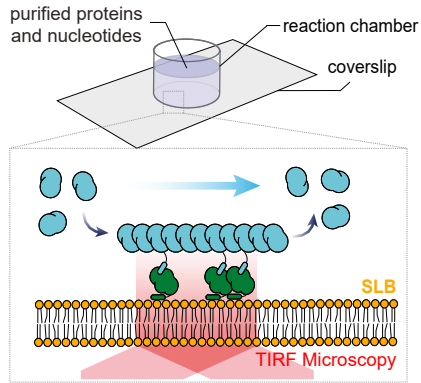

**FtsZ 1.5 $\mu$ M / FtsA 0.5 $\mu$ M**

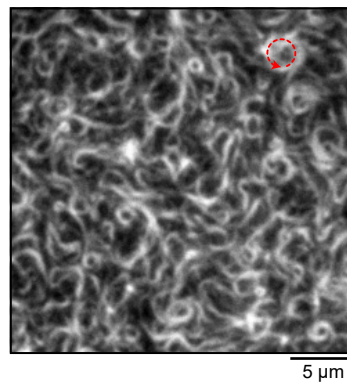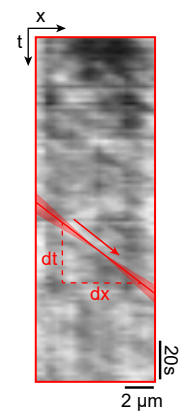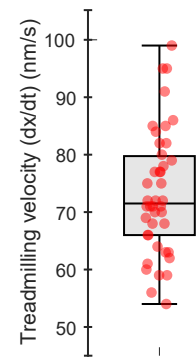

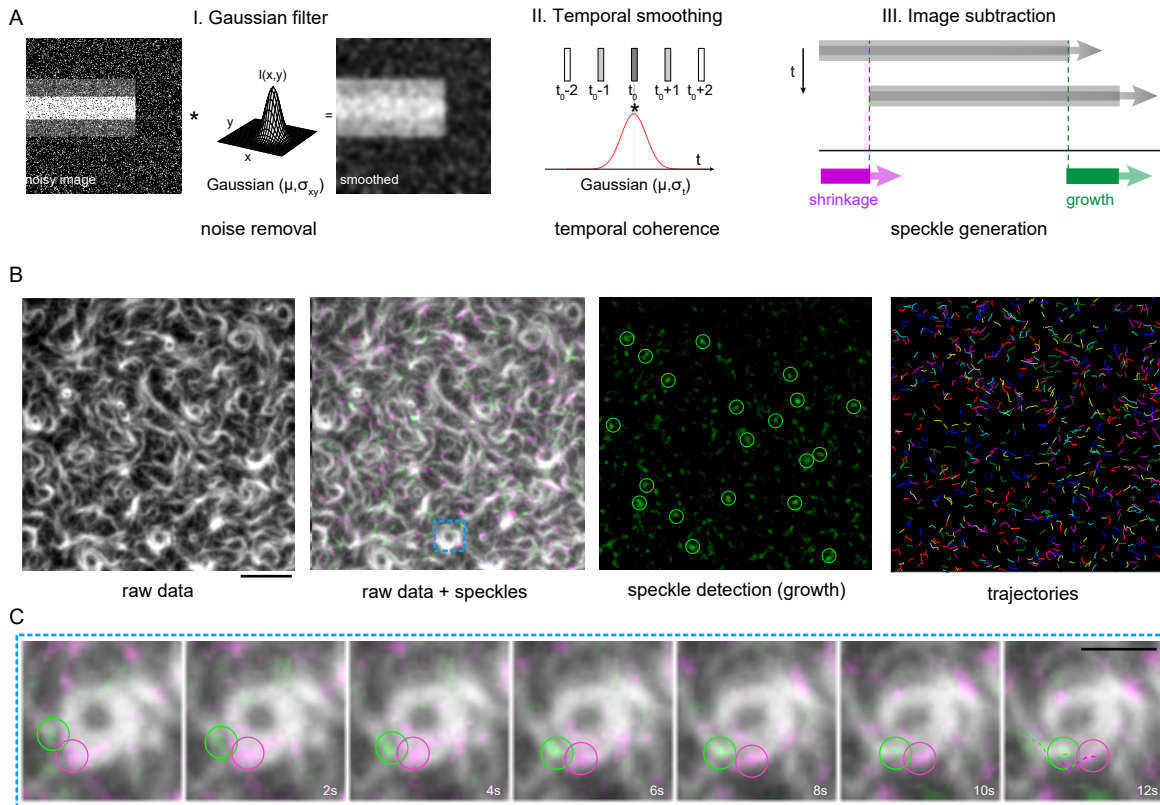

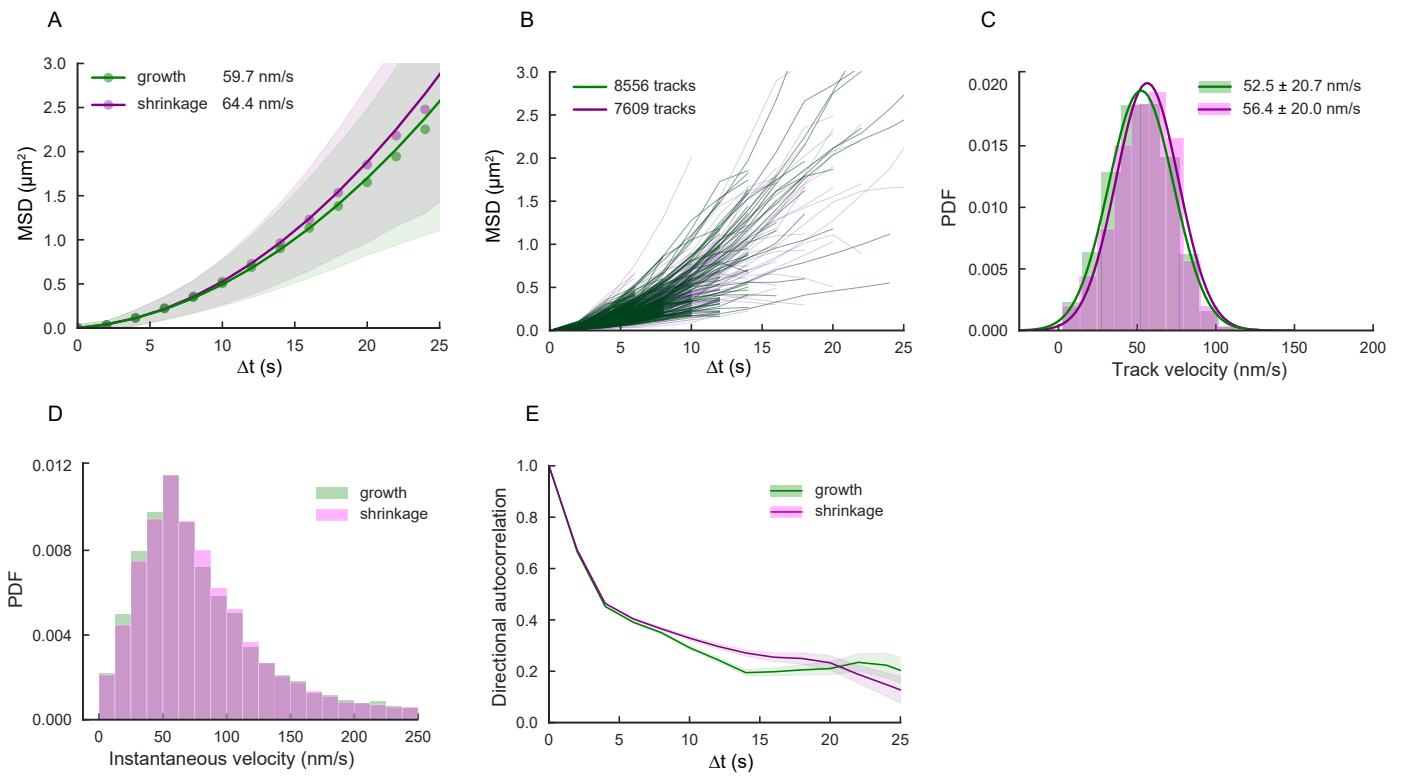

**Fig.4**

bioRxiv preprint doi: <https://doi.org/10.1101/839571>; this version posted November 13, 2019. The copyright holder for this preprint (which was not certified by peer review) is the author/funder, who has granted bioRxiv a license to display the preprint in perpetuity. It is made available under aCC-BY-NC-ND 4.0 International license.

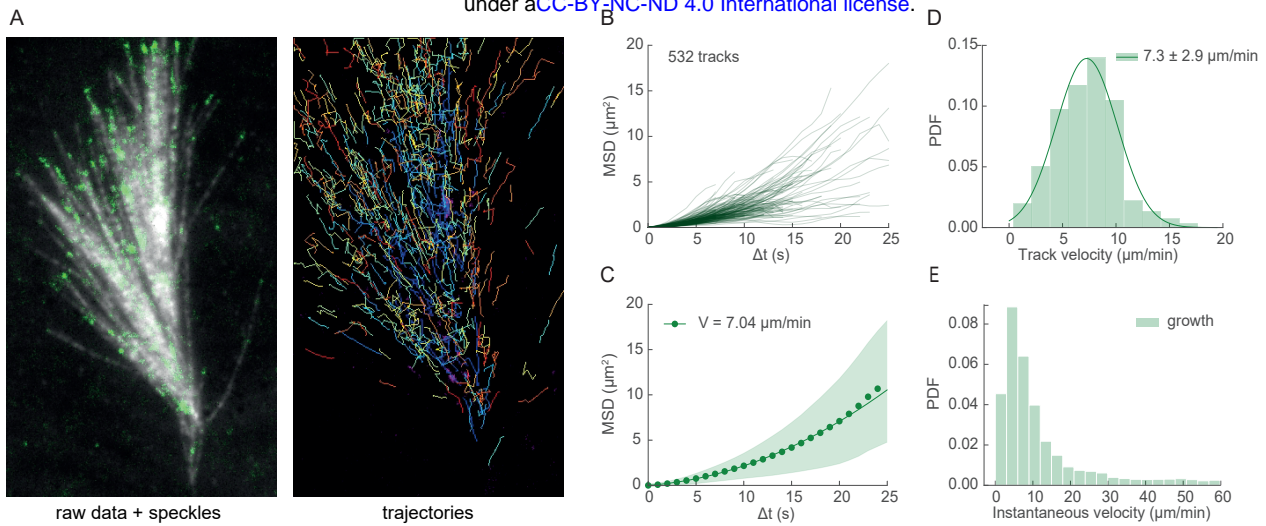

Source: https://www.biorxiv.org/content/10.1101/839571v2.full.pdf
